# Supplementary material for: Screening and Application of DNA Aptamers for Heparin-Binding Protein
Source: MDPI journal article supplement (doi:10.3390/molecules29081717), 2024-04-10
Supplement: s1 [file s1]

**Supporting Information**

# **Screening and Application of DNA Aptamers for Heparin-Binding Protein**

**Xi Zhou, Yingying Cao, Xiaocui Huang, Shuqian Qiu, Xinran Xiang, Huimin Niu, Li Chen, Shuiliang Wang, Zhenyu Li and Shenghang Zhang**

## SECTION A: SUPPORTING TABLES

**Table S1.** Libraries, primers and probe sequences.

| Name                      | Sequence (5'-3')                                                                       |
|---------------------------|----------------------------------------------------------------------------------------|
| Upstream fixed sequence   | TTCAGCACTCCACGCATAGC                                                                   |
| Downstream fixed sequence | CCTATGCGTGCTACCGTGAA                                                                   |
| S1                        | FAM - TTCAGCACTCCACGCATAGC                                                             |
| A2                        | PloyA (19) - Spacer 18 - TTCACGGTAGCACGCATAGG                                          |
| Apt-01(74)                | TTCAGCACTCCACGCATAGCTTCACCTACCGCAATCCGTTGCTCA<br>GTGCTACCGCACCTATGCGTGCTACCGTG         |
| C2-13                     | CTTCACGGTAGCACGC                                                                       |
| Apt-01(74)-BHQ1           | TTCAGCACTCCACGCATAGCTTCACCTACCGCAATCCGTTGCTCA<br>GTGCTACCGCACCTA/iBHQ1dT/GCGTGCTACCGTG |
| C2-13-FAM                 | CTTCACGGTAGCACGC - FAM                                                                 |
| Padlock primer            | GACTGGGCCTCAGTCCGTTTCTCATGGTTC<br>5'P-                                                 |
| Padlock                   | GACTGAGGCCAGTCCTTGAATTTGAC <u>GCGTGCTACCGTGAAGG</u><br>AACCATGAGAAACG                  |

Note: Sequences of letters with corresponding underscores or italics are complementary.

**Table S2.** Control the incubation time and number of wash time of the screen to ensure the affinity of the library to the target.

| SELEX rounds | Negative SELEX      |            | Positive SELEX      |            |
|--------------|---------------------|------------|---------------------|------------|
|              | Incubation time/min | wash times | Incubation time/min | wash times |
| 1            |                     |            | 60                  | 4          |
| 2            | 60                  | 4          | 60                  | 4          |
| 3            | 60                  | 4          | 60                  | 4          |
| 4            | 60                  | 4          | 60                  | 4          |
| 5            | 60                  | 4          | 60                  | 4          |
| 6            | 60                  | 4          | 60                  | 4          |
| 7            | 60                  | 4          | 60                  | 4          |
| 8            | 60                  | 4          | 60                  | 4          |
| 9            | 60                  | 4          | 45                  | 6          |
| 10           | 60                  | 4          | 45                  | 6          |
| 11           | 60                  | 4          | 45                  | 6          |

**Table S3.** Five kinds of cDNA were designed to hybridize to each of the five regions of Apt-01 to explore the regions that bind to aptamer. Sequences underlined are the Apt-01 complementary sites to the cDNA.

| cDNA name | Sequence (5'-3') | Aptamer (5'-3')                                                                                   |
|-----------|------------------|---------------------------------------------------------------------------------------------------|
| C1        | TTCACGGTAG-FAM   | TTCAGCACTCCACGCATAGCTTCACCTACCGCAATCCGTTGCTCAGTGCTACCGCACC/iBHQ1dT/ATGCGTGCT <u>TACCGTGA</u><br>A |
| C2        | GGTAGCACGC-FAM   | TTCAGCACTCCACGCATAGCTTCACCTACCGCAATCCGTTGCTCAGTGCTACCGCACC/iBHQ1dT/ATGCGTGCT <u>TACCGTGA</u><br>A |
| C3        | CATAGGTGCG-FAM   | TTCAGCACTCCACGCATAGCTTCACCTACCGCAATCCGTTGCTCAGTGCTACCGCACC/iBHQ1dT/ATGCGTGCTACCGTGA<br>A          |
| C4        | ATTGCGGTAG-FAM   | TTCAGCACTCCACGCATAGCT/iBHQ1dT/CACCTACCGCAATCCGTTGCTCAGTGCTACCGCACCTATGCGTGCTACCGTGA<br>A          |
| C5        | TGAAGCTATG-FAM   | TTCAGCACTCCACGCATAGCT/iBHQ1dT/CACCTACCGCAATCCGTTGCTCAGTGCTACCGCACCTATGCGTGCTACCGTGA<br>A          |

Note: Sequences of letters with corresponding underscores complement each other.

**Table S4** High-throughput sequencing top 100 sequence results.

| Number | Random sequence (5'-3')               | R11   |
|--------|---------------------------------------|-------|
| 1      | TTCACCTACCGCAATCCGTTGCTCAGTGCTACCGCA  | 11404 |
| 2      | TTCACCTACCGCGCAGCTCAGTCGTTGCCCACACGA  | 11608 |
| 3      | TTCACCTACGAACGCCAGTGACAGCACCGATCAGTG  | 9823  |
| 4      | TTCATCTACCCCGCCAAGGTCAGCCACGTCAGTGTG  | 8127  |
| 5      | TTCACCTACACCGCGACCGCGTTTCAGCCTCTGCAGG | 8966  |
| 6      | TTCATCTACCGCGTTAGCTCAGTCGTCTCGTAACGA  | 8945  |
| 7      | CTTGCCTACCGGACGAAGTACTCAGTCACTCCGTGA  | 5902  |
| 8      | TCATCGCGAGCGACACGTTACCGTGCTTTACTACCG  | 8462  |
| 9      | CTTGCCTACCGATCCTGGATCTCAGCTGTACCACAG  | 7003  |
| 10     | CTTGCCTACCCACAGCGTGTAGTGTACTGCGTACA   | 2379  |
| 11     | TTTACTACCGCGCACTTAGTCGCTCAGCCGTTCCGG  | 5812  |
| 12     | TTCACCTACTGGCATATGCCTCAGTCCACTCCTGGA  | 5850  |
| 13     | TCATCGCCTGCGACATGCTAGCATGCTTTACTACTG  | 5695  |
| 14     | TTCACCTACCGCCAATCAGCTCAGTGTGTCTCCACA  | 3640  |
| 15     | TTCACCTACTGCCCTAGCTCAGCCGTCTCCATCCGG  | 5248  |
| 16     | TTTACCTACCGCGCAGCTCAGTCGTTGCCCACACGA  | 5810  |
| 17     | CTTGCCTACCGACAACCGTCTCAGTTCGTCATCGAA  | 4828  |
| 18     | TTTACCTACCGCATCGCTCAGTCAACCATTTGGTGGA | 4631  |
| 19     | TCATGCCCTGTGCACGGCCCAACCGCTTTACCTACG  | 3666  |
| 20     | TTCACCTACCGCCGAAGGCTCAGTCCGTGCTTCGGA  | 6199  |
| 21     | TTTACCTACTGCCACAACCTGGGGCTCAGCCGCGAGG | 5609  |

|    |                                        |      |
|----|----------------------------------------|------|
| 22 | TCATCCGGATCGGACACATCTTGTGCCTTGCTACTG   | 2286 |
| 23 | TTCACCTACCGCCCTGCTCAGCCGACTCGGATCGG    | 5004 |
| 24 | TTCATCTACCGCGAGCAGCTCAGCATGCCCAGCATG   | 3454 |
| 25 | TTCACCTACTGCCACAACCTGGGGCTCAGCCGCGAGG  | 2844 |
| 26 | TTCATCTACCGTGCCTCTCGCACTCAGCCCCTGTGG   | 4138 |
| 27 | TCATCCCATGGGACCGTTATACGGCTTACCTACCG    | 2718 |
| 28 | TTCATCTACTGCGACTAGCTCAGCCTATCCACTAGG   | 3825 |
| 29 | TTCATCTACCGCACCAGCTCAGCCGACCTCCGGAGG   | 3514 |
| 30 | CTTGCTACCGGGAACCTCAGTCAGTGTGTCAACTGA   | 2449 |
| 31 | TTCACCTACTGCCTCGGCTCAGATTGATTCCGAAT    | 2987 |
| 32 | TTCACCTACCGCCTTGCTCAGCCCATTGGAATGGG    | 2217 |
| 33 | TTCACTACCGCGCTAAGCTCAGTTTGGGTGACCAAA   | 1733 |
| 34 | CTTGTCTACCCGGGAACCGTCAGTCCGTCACACGGA   | 1824 |
| 35 | TTTACCTACCGCAATCCGTTGCTCAGTGCTACCGCA   | 2915 |
| 36 | TTCATCTACCGCCCCAGCTCAGCCGACCTCCGGAGG   | 3092 |
| 37 | CTTGCTACCGTCCTTGACTCAGTTCAGCGCCGTGAA   | 1275 |
| 38 | CTTGCCTACCGGGAGAATCCCTCAGACACAGCGTGT   | 1278 |
| 39 | TTTACTACGACCACCGGGACAGATTGTGCAGACGAT   | 1667 |
| 40 | TTCATCTACCGGTCGCGAGACCTCAGTCACACGTGA   | 1914 |
| 41 | CTTGCTACGAGCCTGCGACAGTCGCAAACCTTTCGA   | 1741 |
| 42 | TTTACTACCGCCCTGGCTCAGATGGTTCCCGGCCAT   | 1319 |
| 43 | CTTGCCTACCCACACCGTGTCTCAGTCTGTACGTCAGA | 2596 |
| 44 | TTCACCTACGAGCGCAGTGACAGTGGTCGCAGTCCA   | 1449 |
| 45 | TTTACCTACCGCCCTGCTCAGCCGACTCGGATCGG    | 2896 |
| 46 | TTTACCTACCGCACCTCGGGCTCAGTTGCATGACAA   | 2289 |
| 47 | TTTACCTACCGCACCCGCTCAGTCGTCTCCGCGA     | 2777 |
| 48 | TTCACCTACCGCACCTCGGGCTCAGTTGCATGACAA   | 1007 |
| 49 | TTCACCTACCGCTACCCTGCTCAGCTGCCAAAGCAG   | 2220 |
| 50 | CTTGCCTACCGACATTGTTGTCTCAGTTCCTACGAA   | 1579 |
| 51 | CTTGCCTACTGCCTATCGGGCTCAGTCGTTCTCGA    | 1850 |
| 52 | TTCACCTACCGCTGTGATTAGCAGCTCAGCCATCGG   | 2664 |
| 53 | TTCATCTACCGCGCAGCTCAGTCGTTGCCACACGA    | 2252 |
| 54 | TTCACCTACCGCGCAGATCGCTCAGCCACTCATTGG   | 1930 |
| 55 | TTTACTACCGCCACATGCTGGCTCAGTCCCTGAGGA   | 1624 |
| 56 | CTCGCCTACCGACAACCGTCTCAGTTCGTCATCGAA   | 811  |
| 57 | TTCACTACCGCGCCAGCTCAGTCGGACCAGCTGCGA   | 944  |
| 58 | TTTACCTACCGCCGTGCTCAGTTGGACTTGTCCCAA   | 1772 |
| 59 | CTTGCCTACCGCGCCAGCTCAGGGAACGTACCGTTGC  | 1536 |
| 60 | CTTGCTACACCGACAACGTGTTTCAGTGGTCCACCA   | 955  |
| 61 | CTTGTCTACCCGCCTACTGGACGTCAGTCGTTGAG    | 837  |
| 62 | TCATTGCCCCGCAACAACCTCGTTTGCTTCATCTACG  | 1240 |
| 63 | TTTACCTACTGCGGAACGCTCAGACGATGCCACCGT   | 1270 |
| 64 | TTTACCTACCTCGCAGTCCGCCCCGCTTGGCATCGGA  | 861  |
| 65 | CTTGCTACCGTCGCCGACTCAGTTGGATTGCCCCAA   | 894  |

|     |                                        |      |
|-----|----------------------------------------|------|
| 66  | CTTGCTACCTCGACAGATCAGTCACACGCCCTGGGA   | 641  |
| 67  | CTTGCCTACCGCATCACATGCTCAGTGTCCGCGACA   | 2066 |
| 68  | TTTACCTACCGCGATCGCTCAGTCCGCCTTGCTGA    | 2315 |
| 69  | CTTGCCTACTGGCCCCGCTGCCTCAGTGTTCTAACA   | 1038 |
| 70  | CTTGCCTACCGTCCTGAACTCAGTCTCGTTCCGAGA   | 851  |
| 71  | TTTACCTACCGCCGTGGCTCAGTTGTCTAGGAACAA   | 1333 |
| 72  | CTTGCTACTCGGAACGTCAGCTCGCACTCCCGCGAG   | 560  |
| 73  | TCATCGTCCCGGACGACGTCCCGCCTTGTCTACCG    | 932  |
| 74  | TTTACCTACCGCGATCAGCTCAGTCTCACCGTGAGA   | 2181 |
| 75  | CTTGCTACGAGTCTGAACGACAGTCCGGTTGACGGA   | 630  |
| 76  | TTTACCTACCGCCAATCAGCTCAGTGTGTCTCCACA   | 1545 |
| 77  | TCATCCGCTCGGACGGTGACCACCGCTTTACCTACG   | 2025 |
| 78  | TTTACCTACTGCCCCGCTCAGTCACGCCACCGTGA    | 2018 |
| 79  | CTTGCTACCCGCGAATAGCGTCAGTCGGCCTTGCGA   | 341  |
| 80  | CTTCCTGGTGTCTGGGCAGTTATAACGGTGCGTCTGA  | 423  |
| 81  | CTTGCCTACCCCGGTCTCGGTCTCAGTCGTTGTGTCGA | 330  |
| 82  | CTTGCCTACCGATCTAGGATCTCAGTGTTGCCGACA   | 783  |
| 83  | TTTACCTACCGCGAGGTACCGACGCTCAGCCTTTGG   | 1743 |
| 84  | TTTACCTACCGCGGATTCTGCTCAGTCTCCAGAGA    | 1632 |
| 85  | TTCACCTACTGCCTTAGCTCAGGTCTGCATACTGAC   | 889  |
| 86  | TTTACCTACCGCACCGACGTCGCTCAGCCCTTGGG    | 1785 |
| 87  | TTCATCTACCGCATCCCGCTCAGTCGGCCGGACCGA   | 1483 |
| 88  | TCATCGGCACGACCGCTATTGCTGCTTTACCTACCG   | 1479 |
| 89  | CTTGCTACCGTTCCCTACCCTGAACTCAGTCCGTGGA  | 455  |
| 90  | CTTGCCTACCGCGACTCGATCTCGCTCAGTCTCTGA   | 911  |
| 91  | CACTTCACCTACGACCACCGGGACATCGCGCTCGATG  | 482  |
| 92  | TTCACCTACTGCCTAGCTCAGCCGTCTCCATCCGG    | 1590 |
| 93  | TTCATCTACCGGTCCCACAGACCTCAGTGCCTCGCA   | 1278 |
| 94  | TTTACCTACCGCACACTGTTGCTCAGTCGCTTTCGA   | 1680 |
| 95  | TTCACCTACCGCGCCAGCTCAGGGAACGTACCGTTGC  | 1355 |
| 96  | TTTACTACCGTGGCCACACTCAGTTGCAGTTCGCAA   | 942  |
| 97  | TTCATCTACGACCTCCCGGGACAGTCACGCCTGTGA   | 1049 |
| 98  | TTCACCTACCGCGTTAGCTCAGTCGTCTCGTAACGA   | 1315 |
| 99  | TTTACCTACCTCGCAGTCTGTCAGCACGTTGCCAGA   | 737  |
| 100 | CTTGCTACCGAGCCGTGCTCTCAGTTCCTTCCAGAA   | 687  |

---

Note: R11 denotes the number of corresponding sequence entries in the eleventh round of screening libraries.

**Table S5** Stability and affinity characterization of 14 candidate aptamers.

| Aptamer | Full-length sequence (5'-3')                                                                 | Family | $\Delta G$<br>(kcal/mol) | $\Delta H$<br>(kcal/mol) | $\Delta S$<br>(kcal/mol) | $T_m$<br>(°C) | RU    |
|---------|----------------------------------------------------------------------------------------------|--------|--------------------------|--------------------------|--------------------------|---------------|-------|
| Apt-01  | TTCAGCACTCCACGCAT<br>AGCTTCACCTACCGCAA<br>TCCGTTGCTCAGTGCTA<br>CCGCACCTATGCGTGCT<br>ACCGTGAA | 5      | -12.48                   | -145.20                  | -445.15                  | 53.0          | 424.1 |
| Apt-02  | TTCAGCACTCCACGCAT<br>AGCTTCACCTACCGCGC<br>AGCTCAGTCGTTGCCCA<br>CACGACCTATGCGTGCT<br>ACCGTGAA | 5      | -11.43                   | -134.50                  | -412.78                  | 52.7          | 161.7 |
| Apt-03  | TTCAGCACTCCACGCAT<br>AGCTTCACCTACGAACG<br>CCAGTGACAGCACCGAT<br>CAGTGCCTATGCGTGCT<br>ACCGTGAA | 3      | -11.67                   | -131.10                  | -400.57                  | 54.1          | 118.6 |
| Apt-04  | TTCAGCACTCCACGCAT<br>AGCTTCATCTACCCCGC<br>CAAGGTCAGCCACGTC<br>AGTGTGCCTATGCGTGC<br>TACCGTGAA | 3      | -9.16                    | -139.80                  | -438.17                  | 45.9          | 121.1 |
| Apt-05  | TTCAGCACTCCACGCAT<br>AGCTTCACCTACACCGC<br>GACCGCGTTCAGCCTCT<br>GCAGGCCTATGCGTGCT<br>ACCGTGAA | 2      | -12.07                   | -138.80                  | -425.05                  | 53.4          | 132.2 |
| Apt-07  | TTCAGCACTCCACGCAT<br>AGCCTTGCCTACCGGAC<br>GAAGTACTCAGTCACTC<br>CGTGACCTATGCGTGCT<br>ACCGTGAA | 6      | -10.24                   | -143.60                  | -447.29                  | 47.9          | 76.2  |
| Apt-08  | TTCAGCACTCCACGCAT<br>AGCTCATCGCGAGCGAC<br>ACGTTACCGTGCTTTAC<br>TACCGCCTATGCGTGCT<br>ACCGTGAA | 1      | -12.14                   | -129.80                  | -394.63                  | 55.8          | 79    |
| Apt-09  | TTCAGCACTCCACGCAT<br>AGCCTTGCCTACCGATC<br>CTGGATCTCAGCTGTAC<br>CACAGCCTATGCGTGCT<br>ACCGTGAA | 6      | -11.14                   | -141.60                  | -437.57                  | 50.5          | 87.5  |

|        |                    |   |        |         |         |      |       |
|--------|--------------------|---|--------|---------|---------|------|-------|
|        | TTCAGCACTCCACGCAT  |   |        |         |         |      |       |
|        | AGCTTCACCTACTGGCA  |   |        |         |         |      |       |
| Apt-12 | TATGCCTCAGTCCACTC  | 7 | -13.07 | -144.00 | -439.14 | 54.8 | 107.2 |
|        | CTGGACCTATGCGTGCT  |   |        |         |         |      |       |
|        | ACCGTGAA           |   |        |         |         |      |       |
|        | TTCAGCACTCCACGCAT  |   |        |         |         |      |       |
|        | AGCTCATCGCCTGCGAC  |   |        |         |         |      |       |
| Apt-13 | ATGCTAGCATGCTTTACT | 1 | -11.76 | -129.10 | -393.56 | 54.9 | 169.4 |
|        | ACTGCCTATGCGTGCTA  |   |        |         |         |      |       |
|        | CCGTGAA            |   |        |         |         |      |       |
|        | TTCAGCACTCCACGCAT  |   |        |         |         |      |       |
|        | AGCTTCACCTACCGCCA  |   |        |         |         |      |       |
| Apt-14 | ATCAGCTCAGTGTGTCT  | 4 | -11.34 | -129.50 | -396.31 | 53.6 | 50.3  |
|        | CCACACCTATGCGTGCT  |   |        |         |         |      |       |
|        | ACCGTGAA           |   |        |         |         |      |       |
|        | TTCAGCACTCCACGCAT  |   |        |         |         |      |       |
|        | AGCTTCACCTACTGCCC  |   |        |         |         |      |       |
| Apt-15 | TAGCTCAGCCGTCTCCA  | 2 | -11.21 | -125.00 | -381.65 | 54.4 | 72.5  |
|        | TCCGGCCTATGCGTGCT  |   |        |         |         |      |       |
|        | ACCGTGAA           |   |        |         |         |      |       |
|        | TTCAGCACTCCACGCAT  |   |        |         |         |      |       |
|        | AGCTTTACCTACCGCAT  |   |        |         |         |      |       |
| Apt-18 | CGCTCAGTCAACCATTG  | 7 | -9.57  | -103.30 | -314.37 | 55.4 | 41.2  |
|        | GTGGACCTATGCGTGCT  |   |        |         |         |      |       |
|        | ACCGTGAA           |   |        |         |         |      |       |
|        | TTCAGCACTCCACGCAT  |   |        |         |         |      |       |
|        | AGCTTCACCTACCGCCG  |   |        |         |         |      |       |
| Apt-20 | AAGGCTCAGTCCGTGCT  | 4 | -15.44 | -146.80 | -440.58 | 60.0 | 99    |
|        | TCGGACCTATGCGTGCT  |   |        |         |         |      |       |
|        | ACCGTGAA           |   |        |         |         |      |       |

Note: The Gibbs free energy showed that the 14 selected candidate aptamers were all stable with little variation between sequences, but seven candidate aptamers showed response values (RU) of more than 100 RU to HBP, of which Apt-01, Apt-02, and Apt-13 showed response values of more than 150 RU.

**SECTION B: SUPPORTING FIGURES**

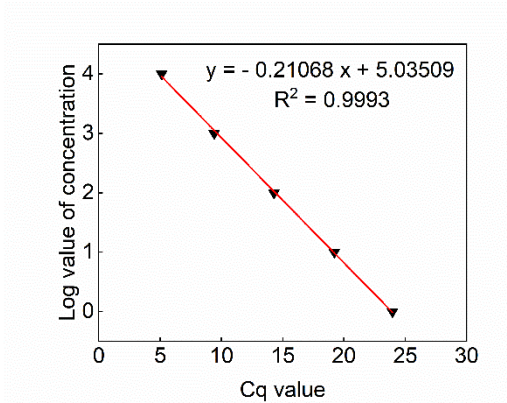

**Figure S1.** Characterization of the library. Standard curves for initial libraries alongside log values of their concentrations.

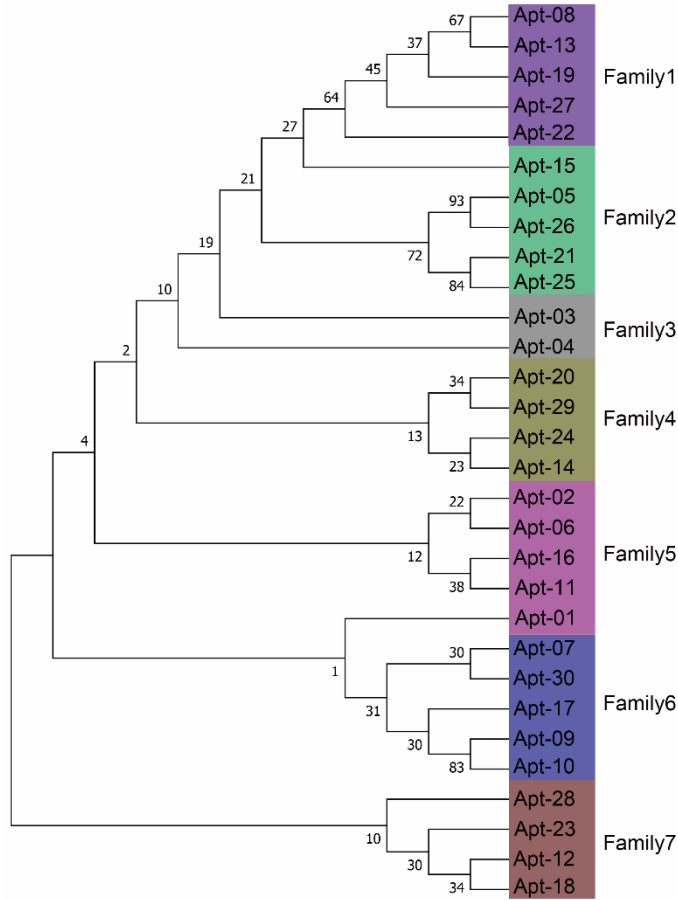

**Figure S2.** Following sequencing, the initial 30 sequences were examined for homology and separated into seven families according to their homolog.



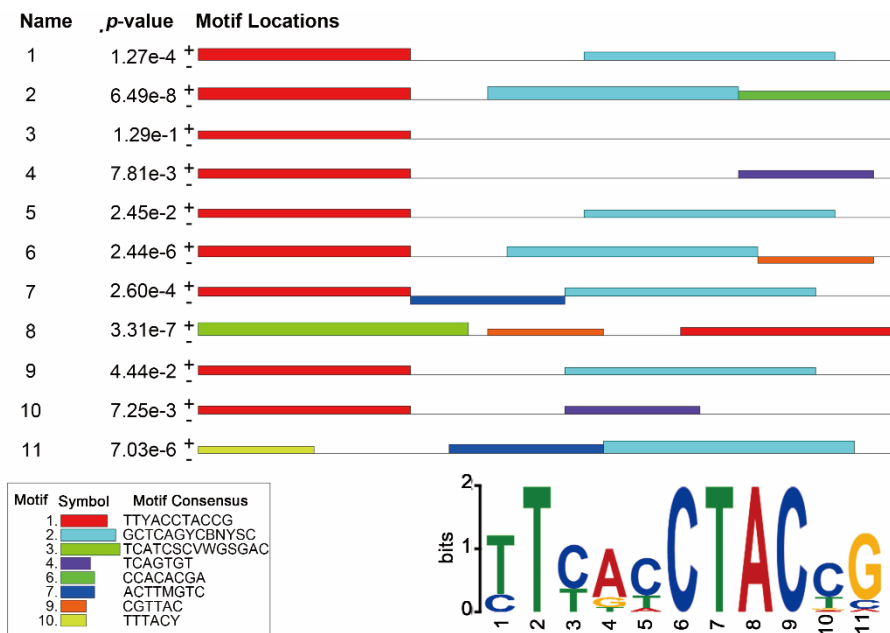

**Figure S3.** Conserved and variant site assessment of the top 30 sequences with comparatively high abundance.

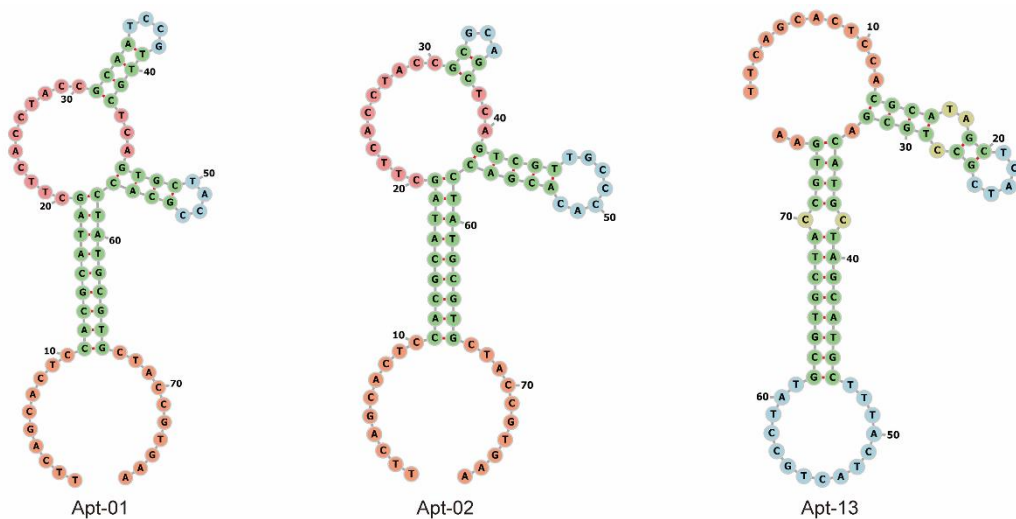

**Figure S4.** Modeling of the secondary structure of three aptamers using Mfold.

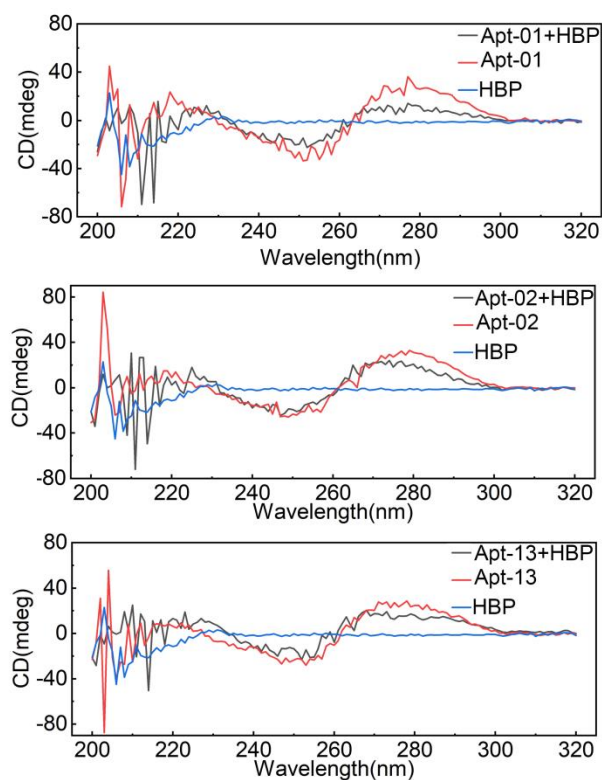

**Figure S5.** Aptamer and HBP of CD spectra in PBS buffer..

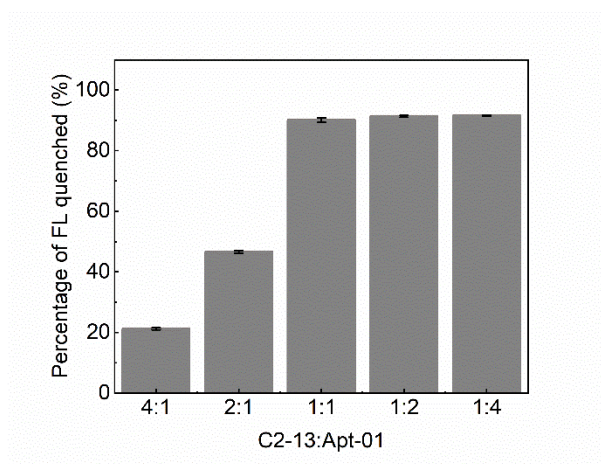

**Figure S6.** The FRET effect occurred following the hybridization of FAM modified C2-13 with BHQ1 modified Apt-01.

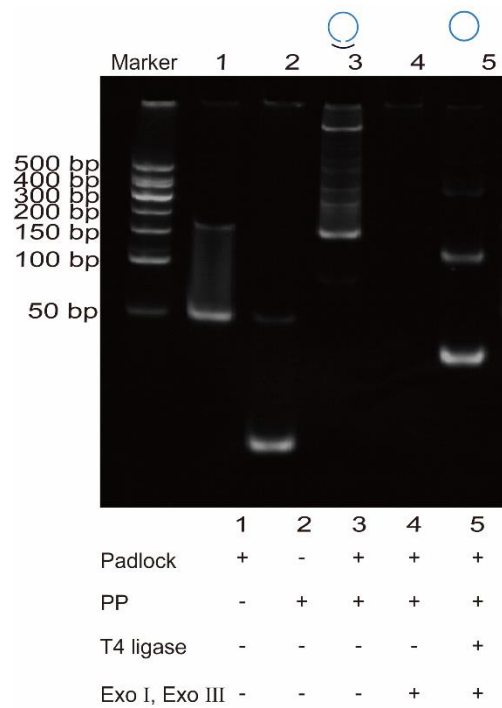

**Figure S7.** Characterization of CT formation by polypropylene gel electrophoresis.
